# Supplementary material for: Evaluating the implementation of a personal health record for chronic primary and secondary care: a mixed methods approach
Source: Springer Nature journal article supplement (doi:10.1186/s12911-019-0969-7), 2019-11-27

## Appendix 1. An example of a care pathway with the integration of a PHR for T2DM after the diagnosis

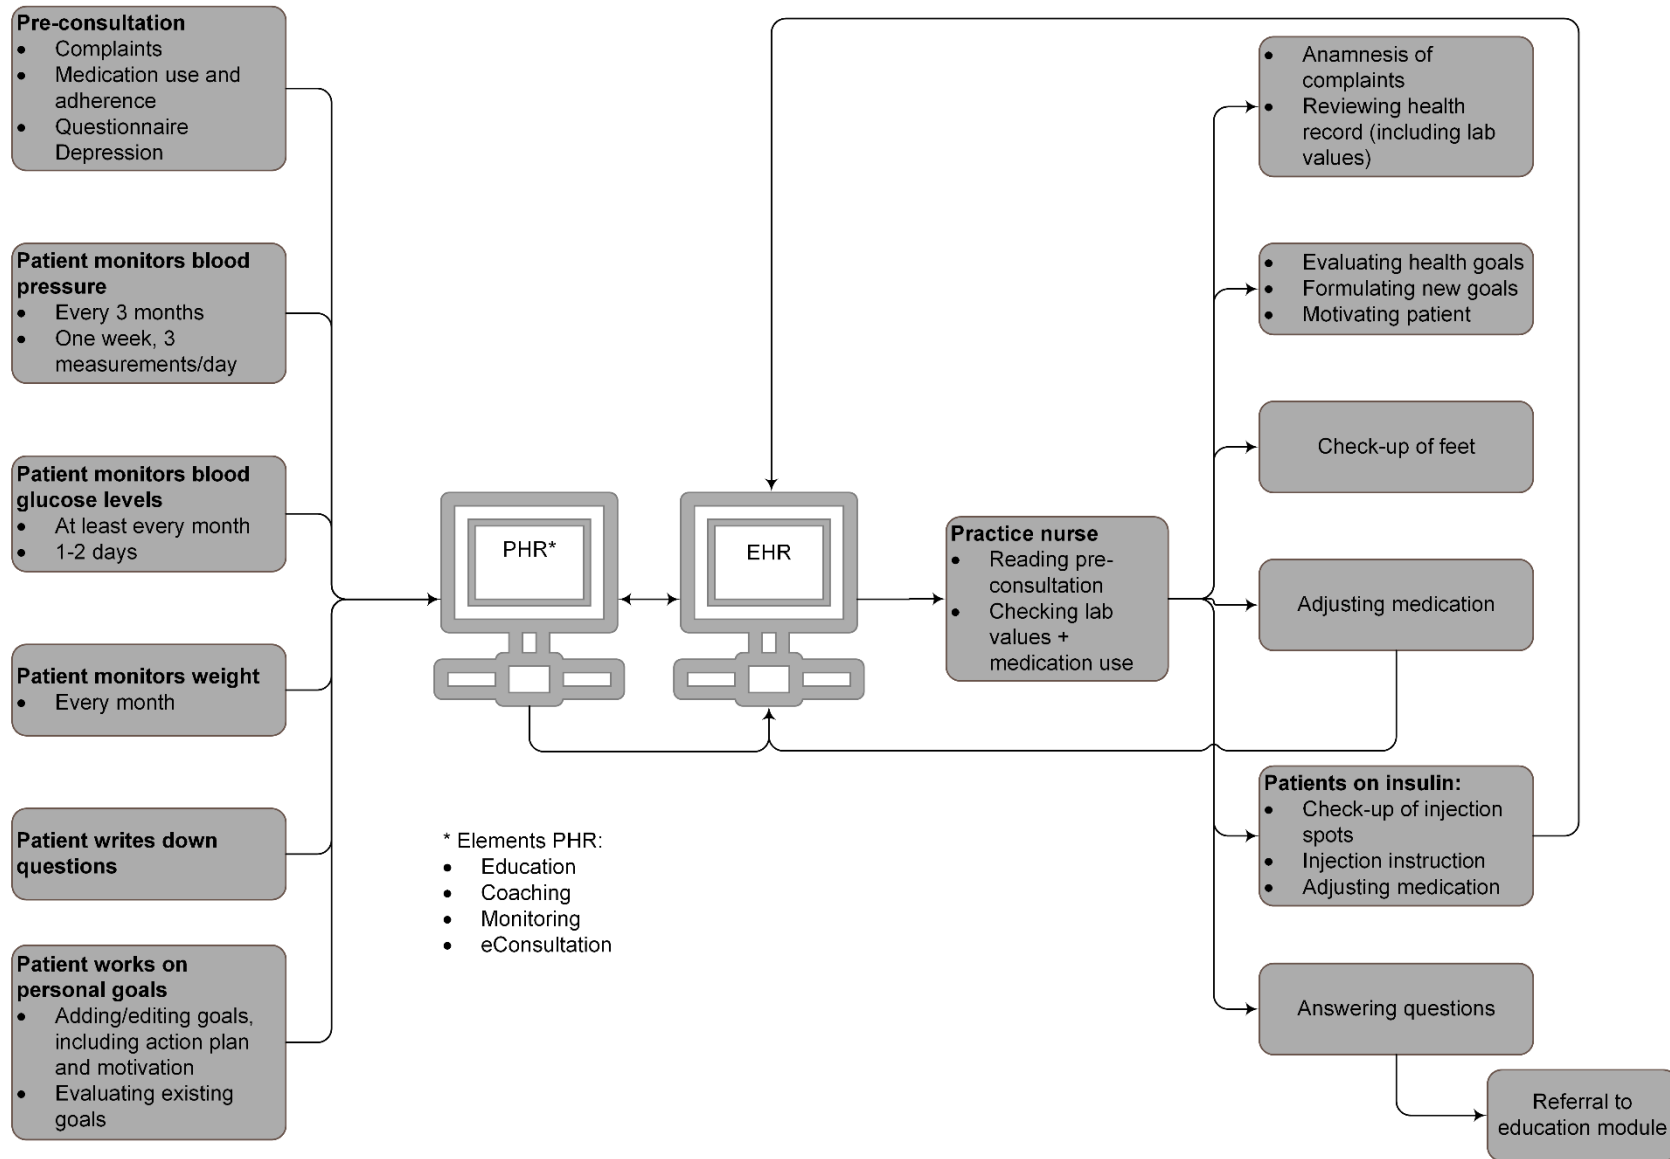

Supplement: MOESM1 [file 17440162]
